# Supplementary material
Source: Springer Nature journal article supplement (https://www.springermedizin.de/resource/supplementary/12884_2014_1246_MOESM1_ESM.pdf/9459150)
Supplement: MOESM1 [file 9459150]

Part 1: Derivation, Cohort 1 (N = 500)

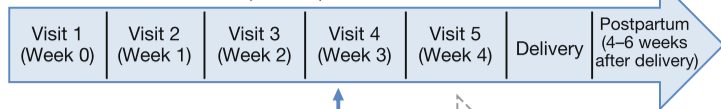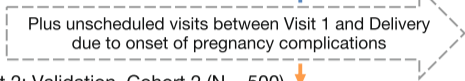

Part 2: Validation, Cohort 2 (N = 500)

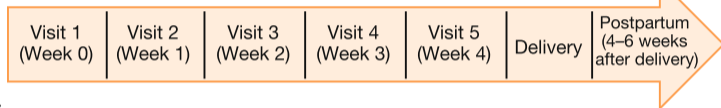

STUDY POPULATION

Women with suspicion of clinical diagnosis of preeclampsia

Gestational week 24 + 0 days to 36 + 6 days (Planned N = 1000)

KEY ASSESSMENTS

|                                             |                                |   |   |   |   |   |   |
|---------------------------------------------|--------------------------------|---|---|---|---|---|---|
| Blood pressure                              | ✓                              | ✓ | ✓ | ✓ | ✓ | ✓ | ✓ |
| Proteinuria                                 | ✓                              | ✓ | ✓ | ✓ | ✓ |   | ✓ |
| Preeclampsia status, symptoms/ HELLP        |                                | ✓ | ✓ | ✓ | ✓ | ✓ | ✓ |
| Laboratory parameters <sup>a</sup>          | ✓                              | ✓ | ✓ | ✓ | ✓ | ✓ |   |
| IUGR/SGA                                    | At one visit during Visits 1–5 |   |   |   |   | ✓ |   |
| Serum samples for BM analysis (sFit-1/PIGF) | ✓                              | ✓ | ✓ | ✓ | ✓ |   |   |
| AEs/SAEs                                    | ✓                              | ✓ | ✓ | ✓ | ✓ | ✓ | ✓ |
| Maternal status                             |                                | ✓ | ✓ | ✓ | ✓ | ✓ | ✓ |
| Fetal/neonatal status/disorders             |                                |   |   |   |   | ✓ | ✓ |
